# Supplementary material for: Suitable Habitat Prediction and Analysis of Dendrolimus houi and Its Host Cupressus funebris in the Chinese Region
Source: MDPI journal article supplement (doi:10.3390/f15010162), 2024-01-12
Supplement: s1 [file s1]

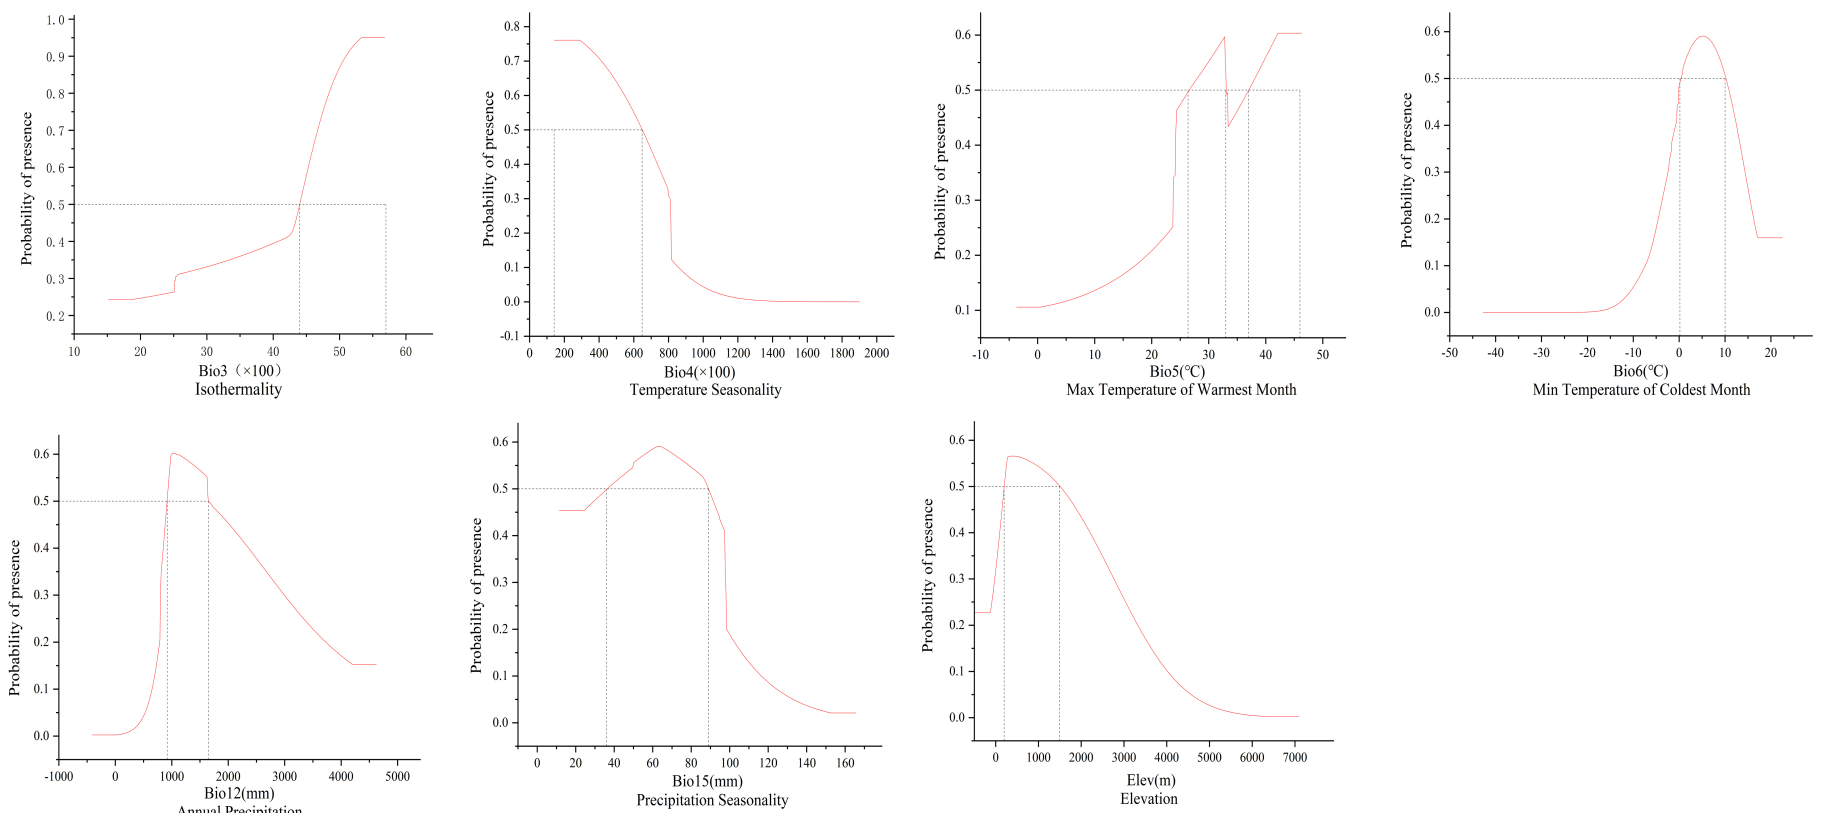

### *Dendrolimus houi*

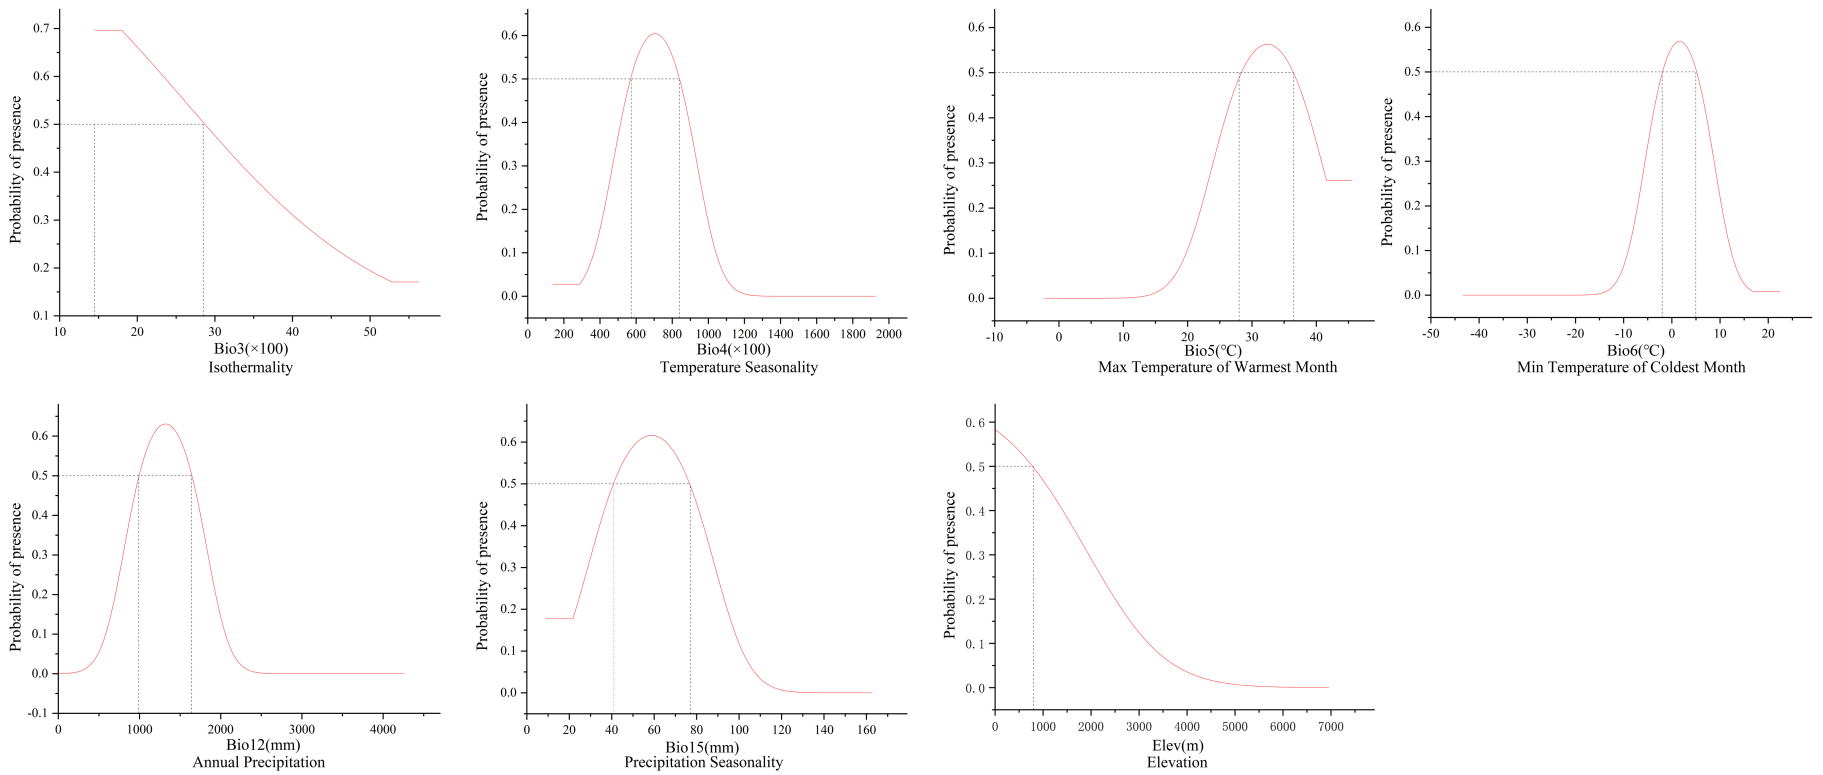

### *Cupressus funebris*

Figure S1: Response curves of 7 environmental variables in a suitable habitat distribution model of *D. houi* and *C. funebris*
